# Supplementary material for: scRNAseq and High-Throughput Spatial Analysis of Tumor and Normal Microenvironment in Solid Tumors Reveal a Possible Origin of Circulating Tumor Hybrid Cells
Source: MDPI journal article supplement (doi:10.3390/cancers16071444), 2024-04-08

Supplementary Figure 1:

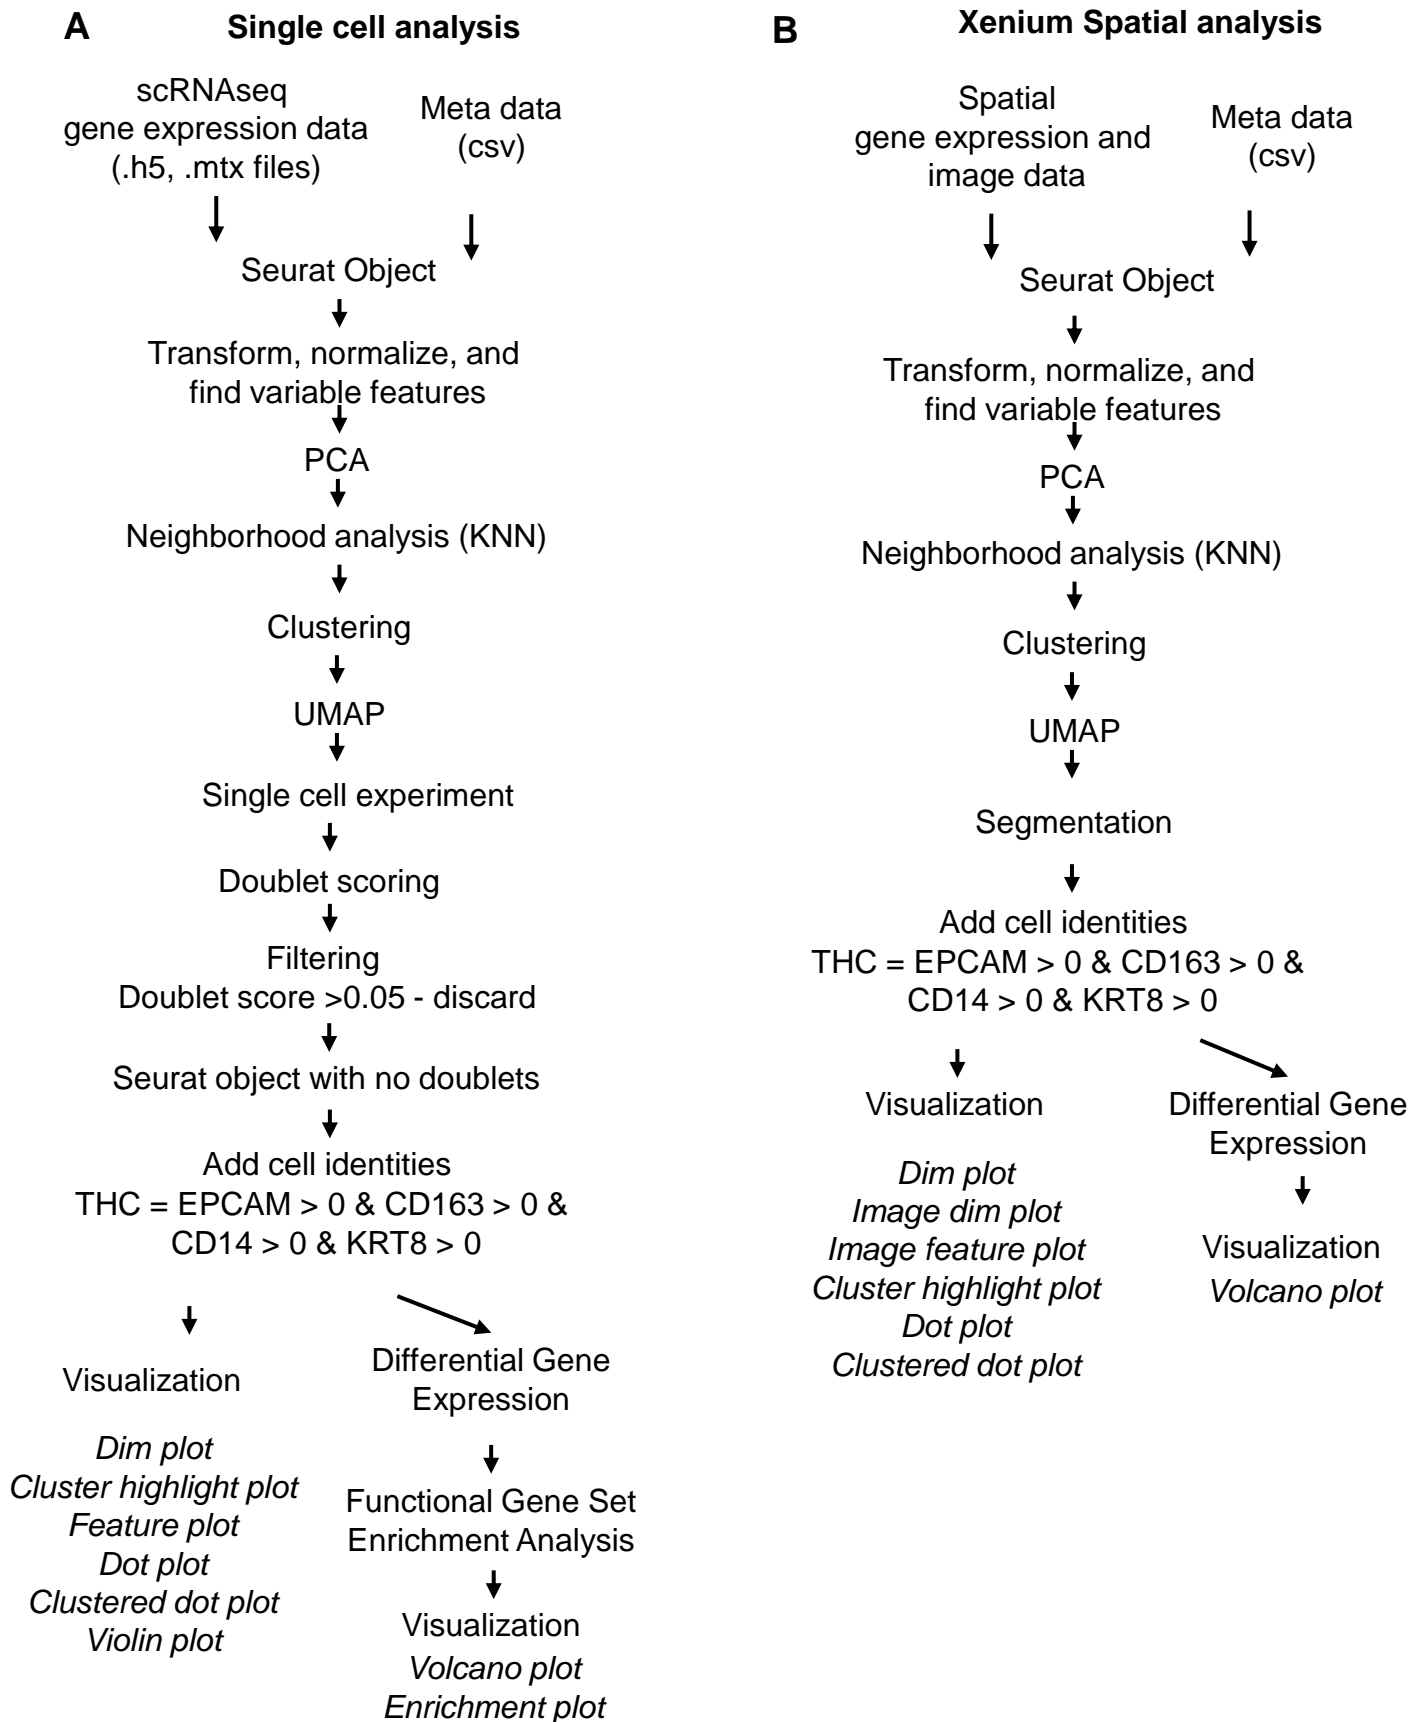

Supplementary Figure 2:

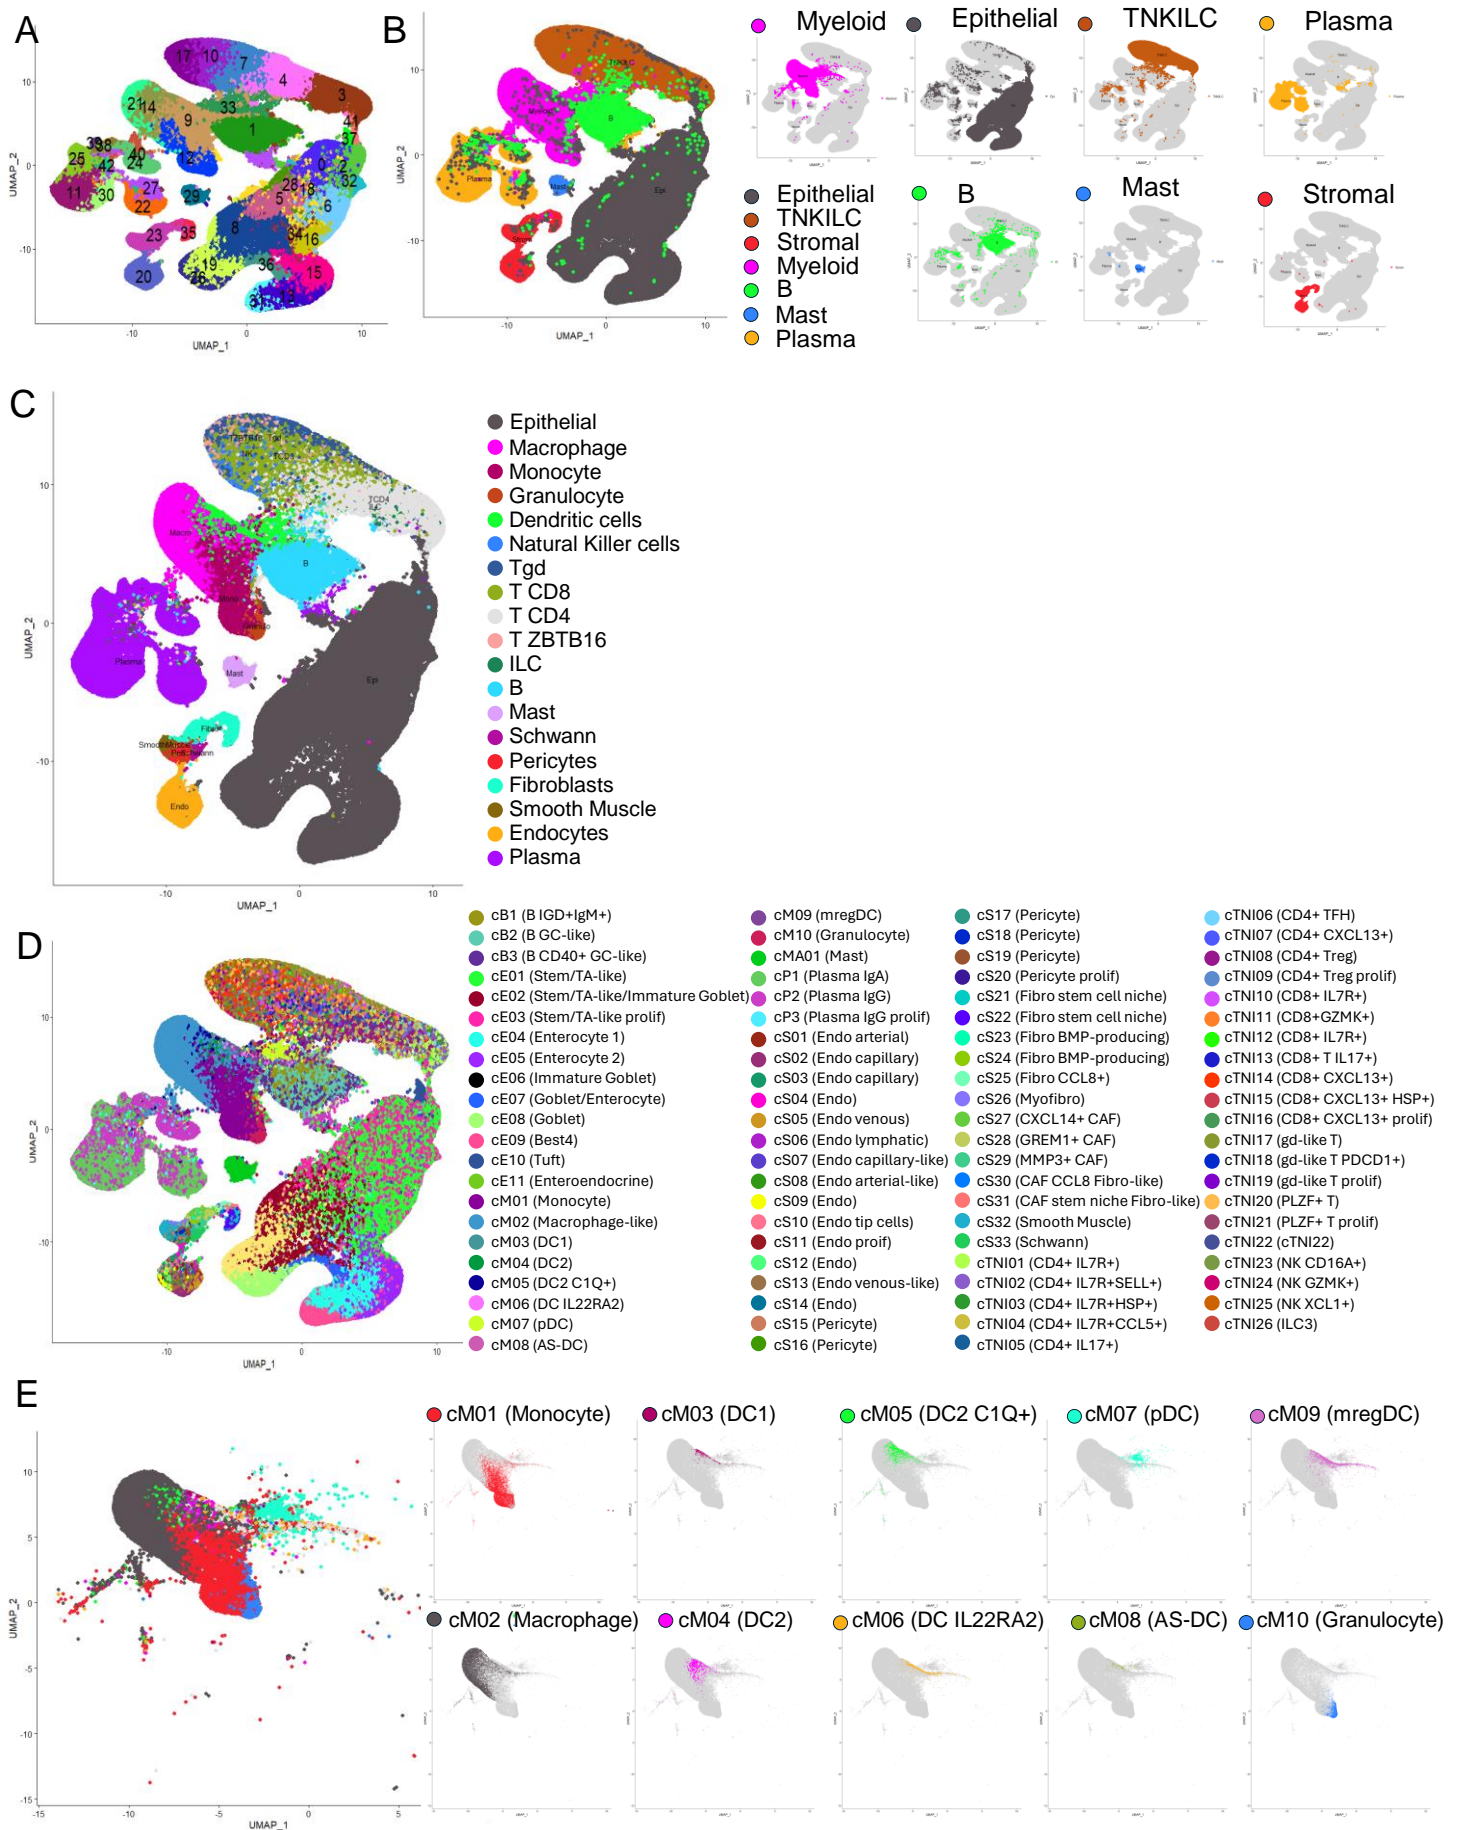

Supplementary Figure 3:

A

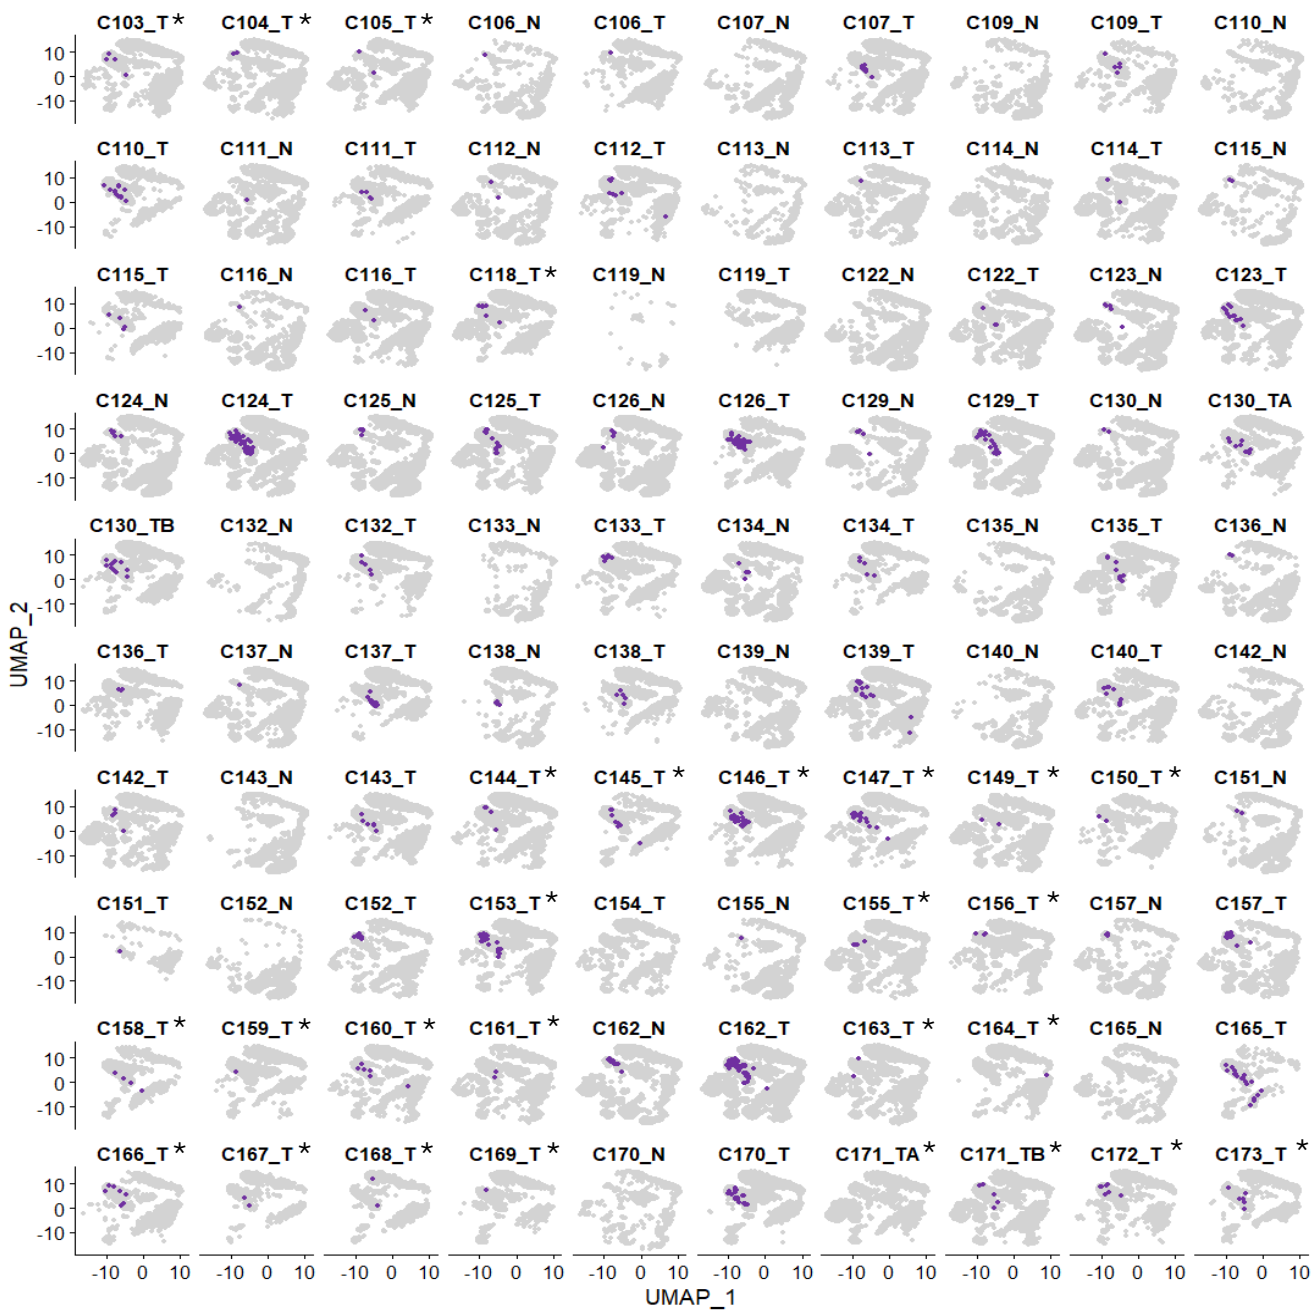

B

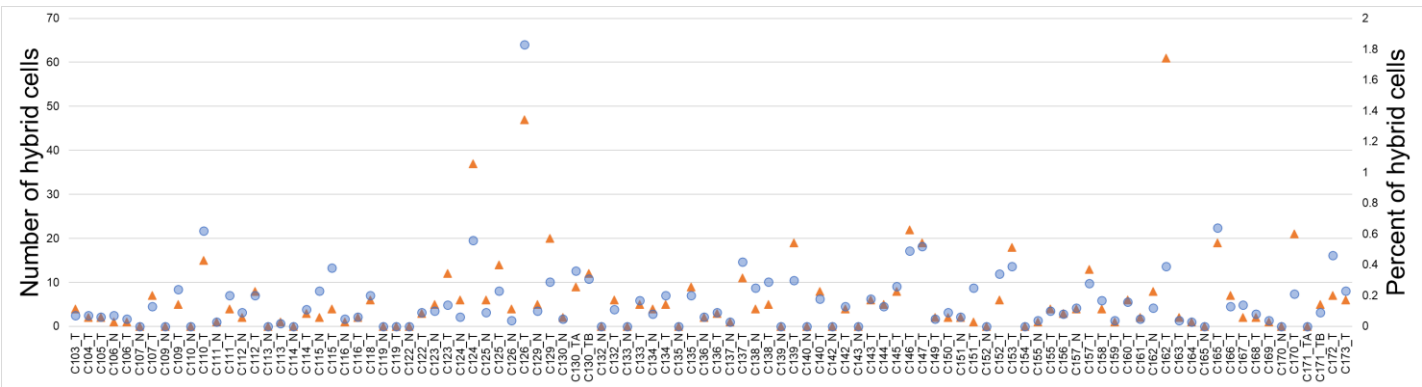

Supplementary Figure 4:

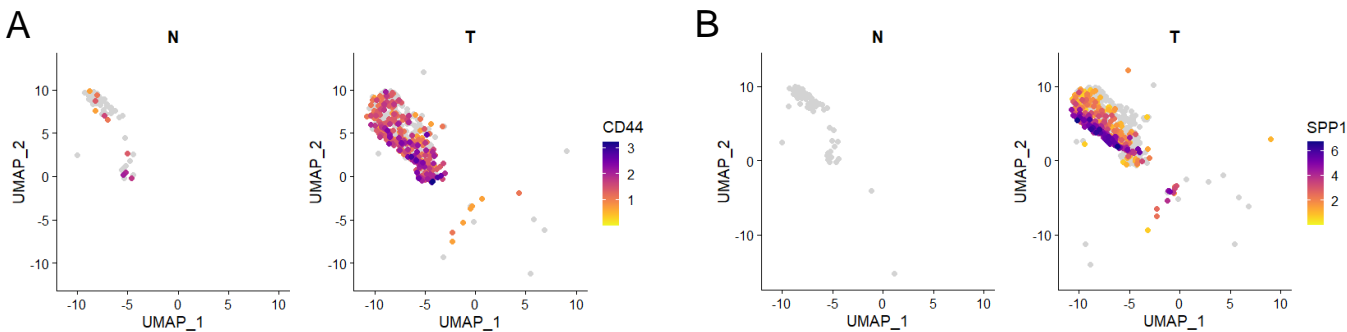

Supplementary Figure 5:

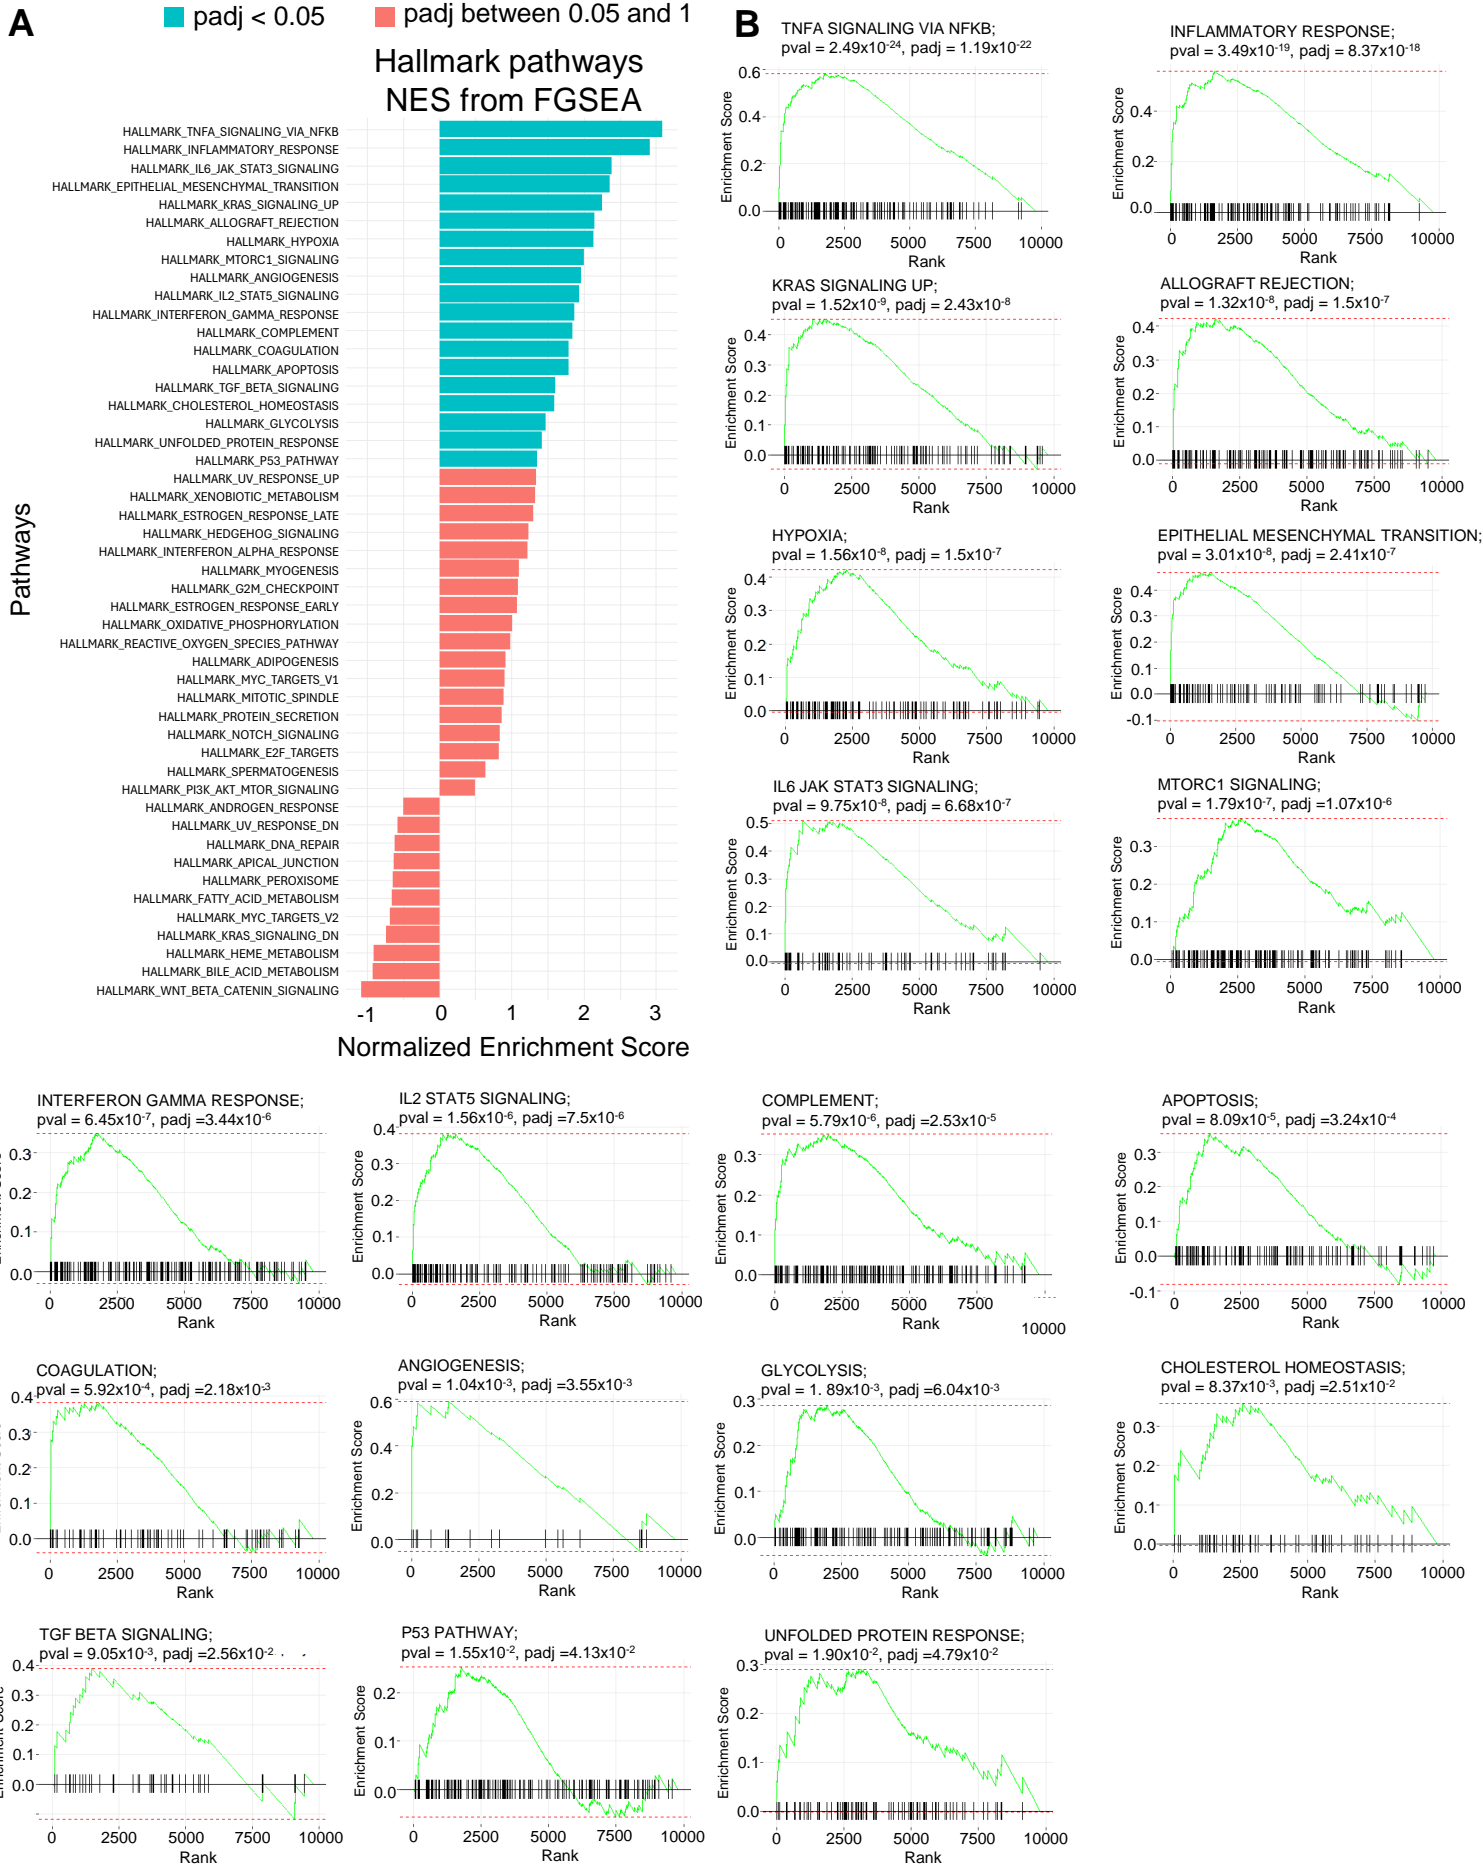

Supplementary Figure 6:

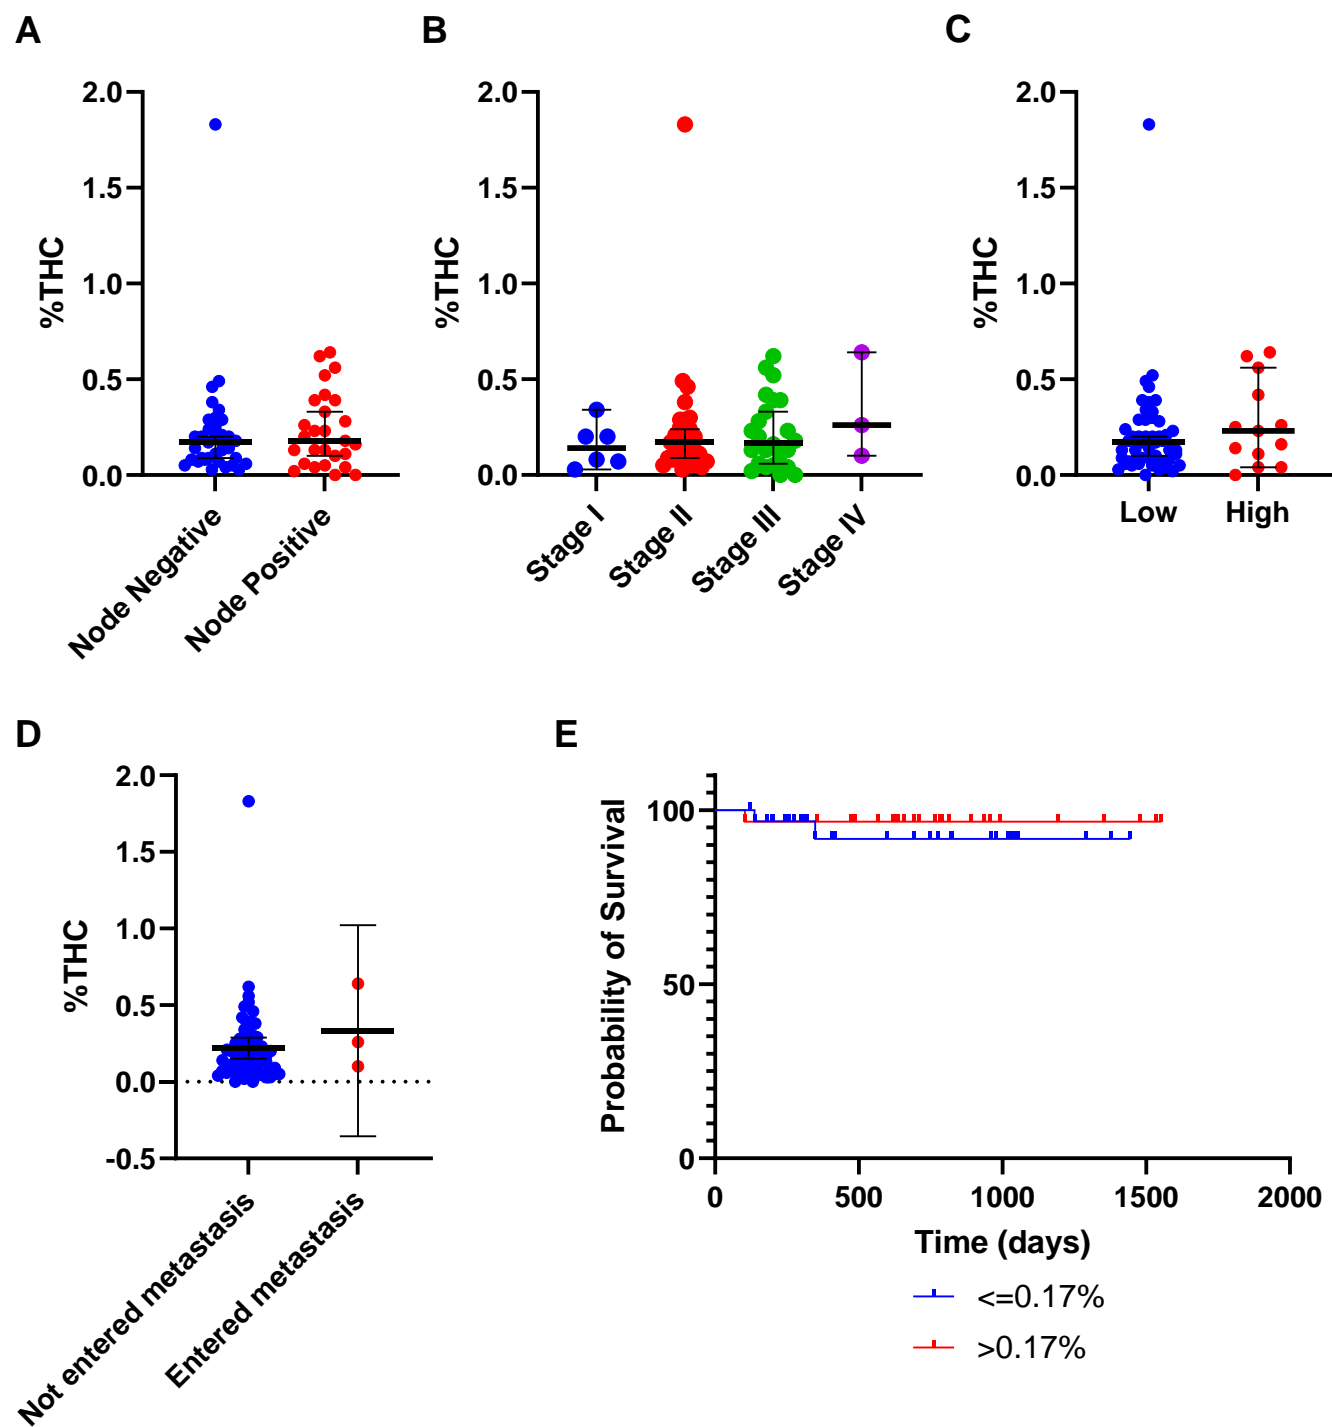



Supplementary Figure 7:

**A**

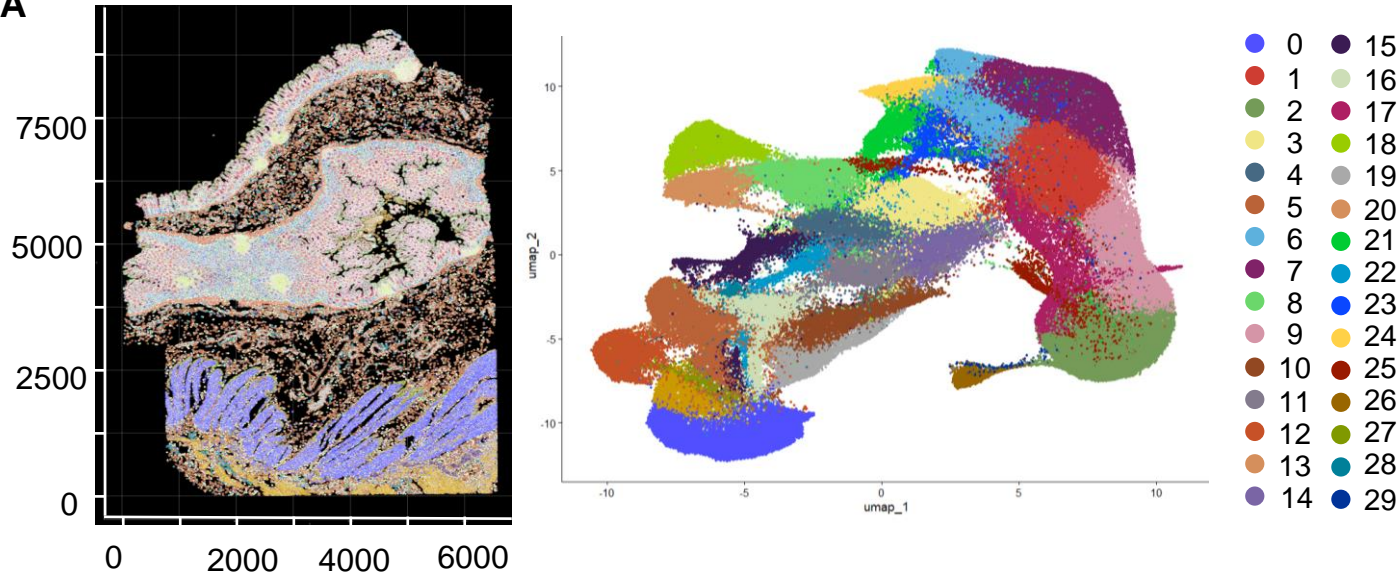

**B**

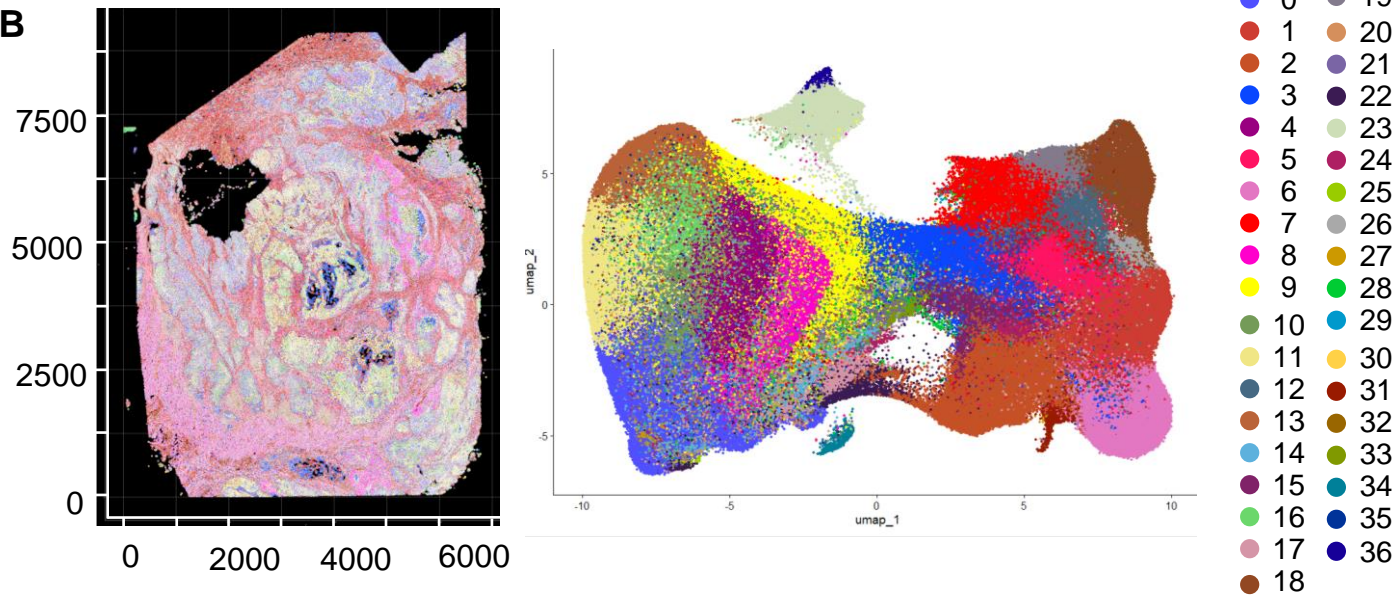

**C**

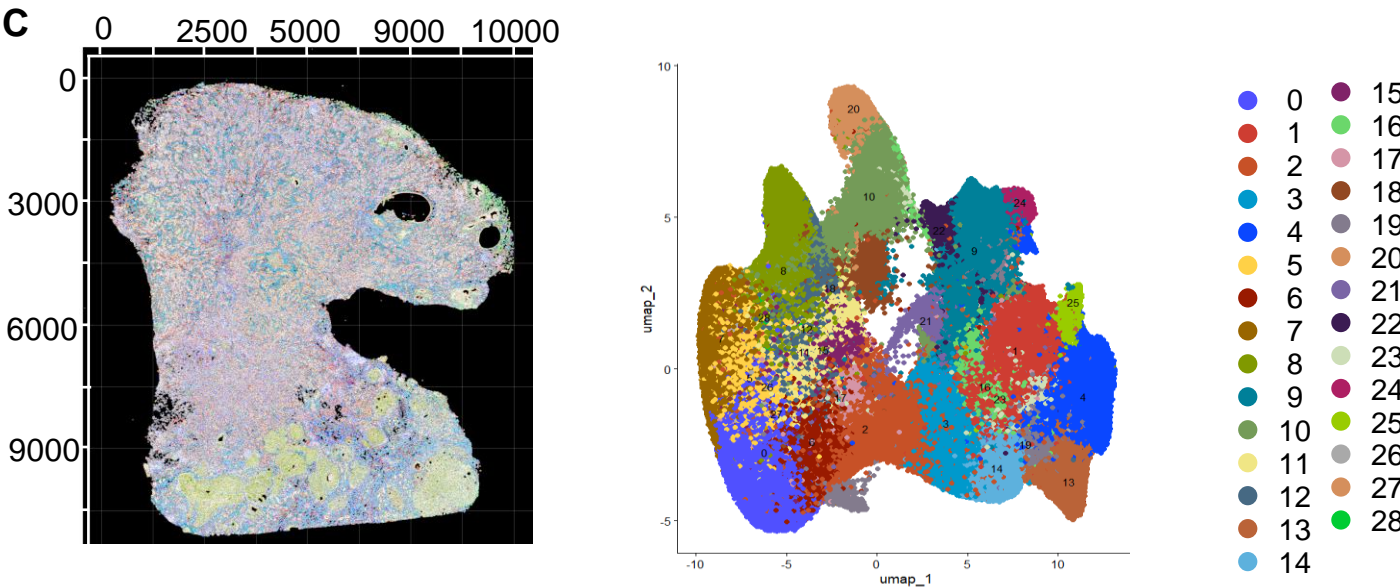



Supplementary Figure 8:

**A** Normal colon

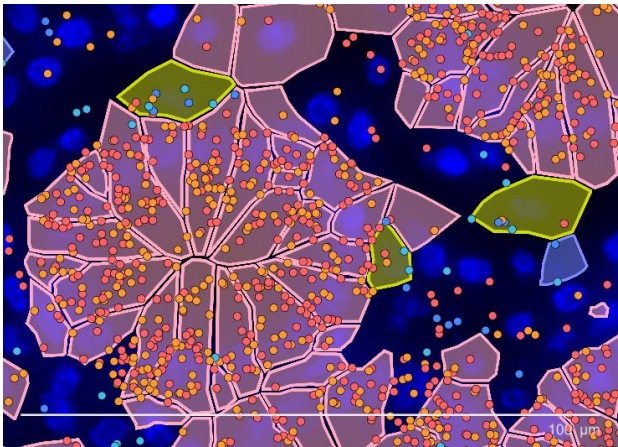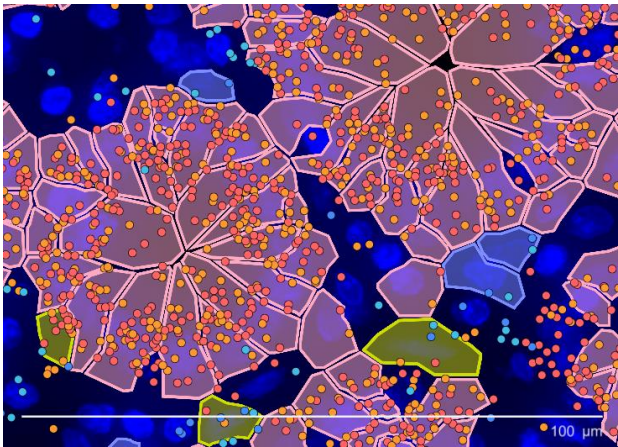

**B** Tumor colon

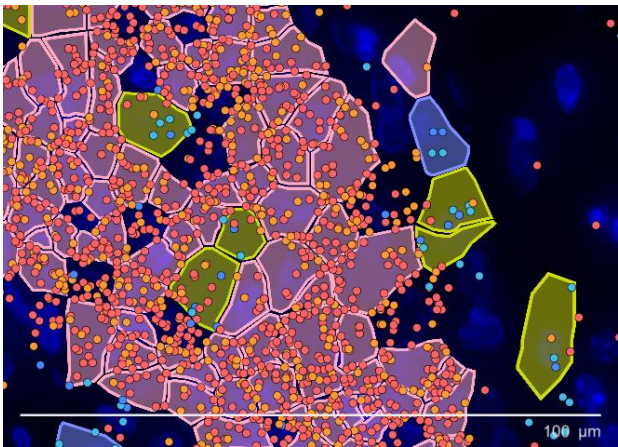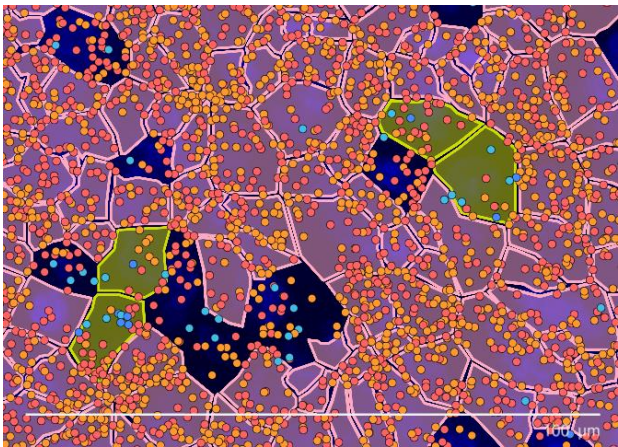

**C** Tumor breast

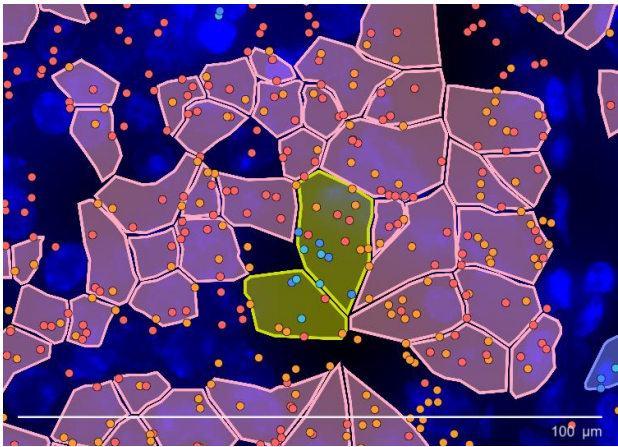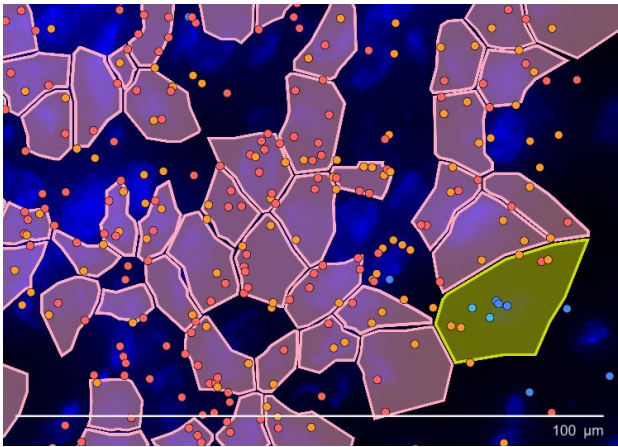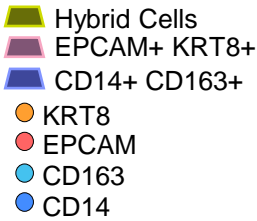



**Supplementary Figure 9:**

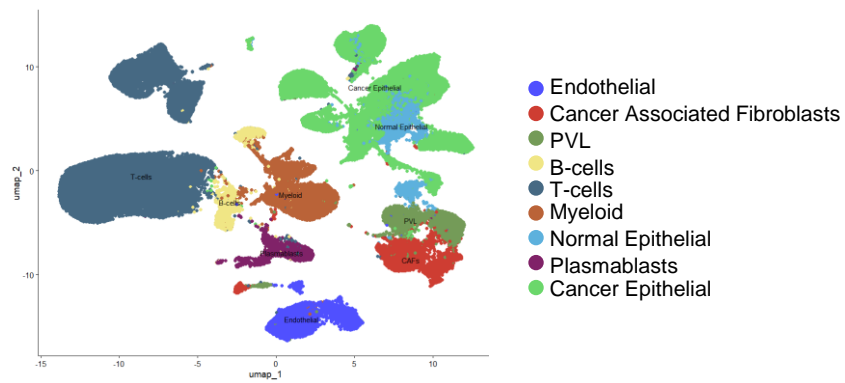

Supplementary Figure 10:

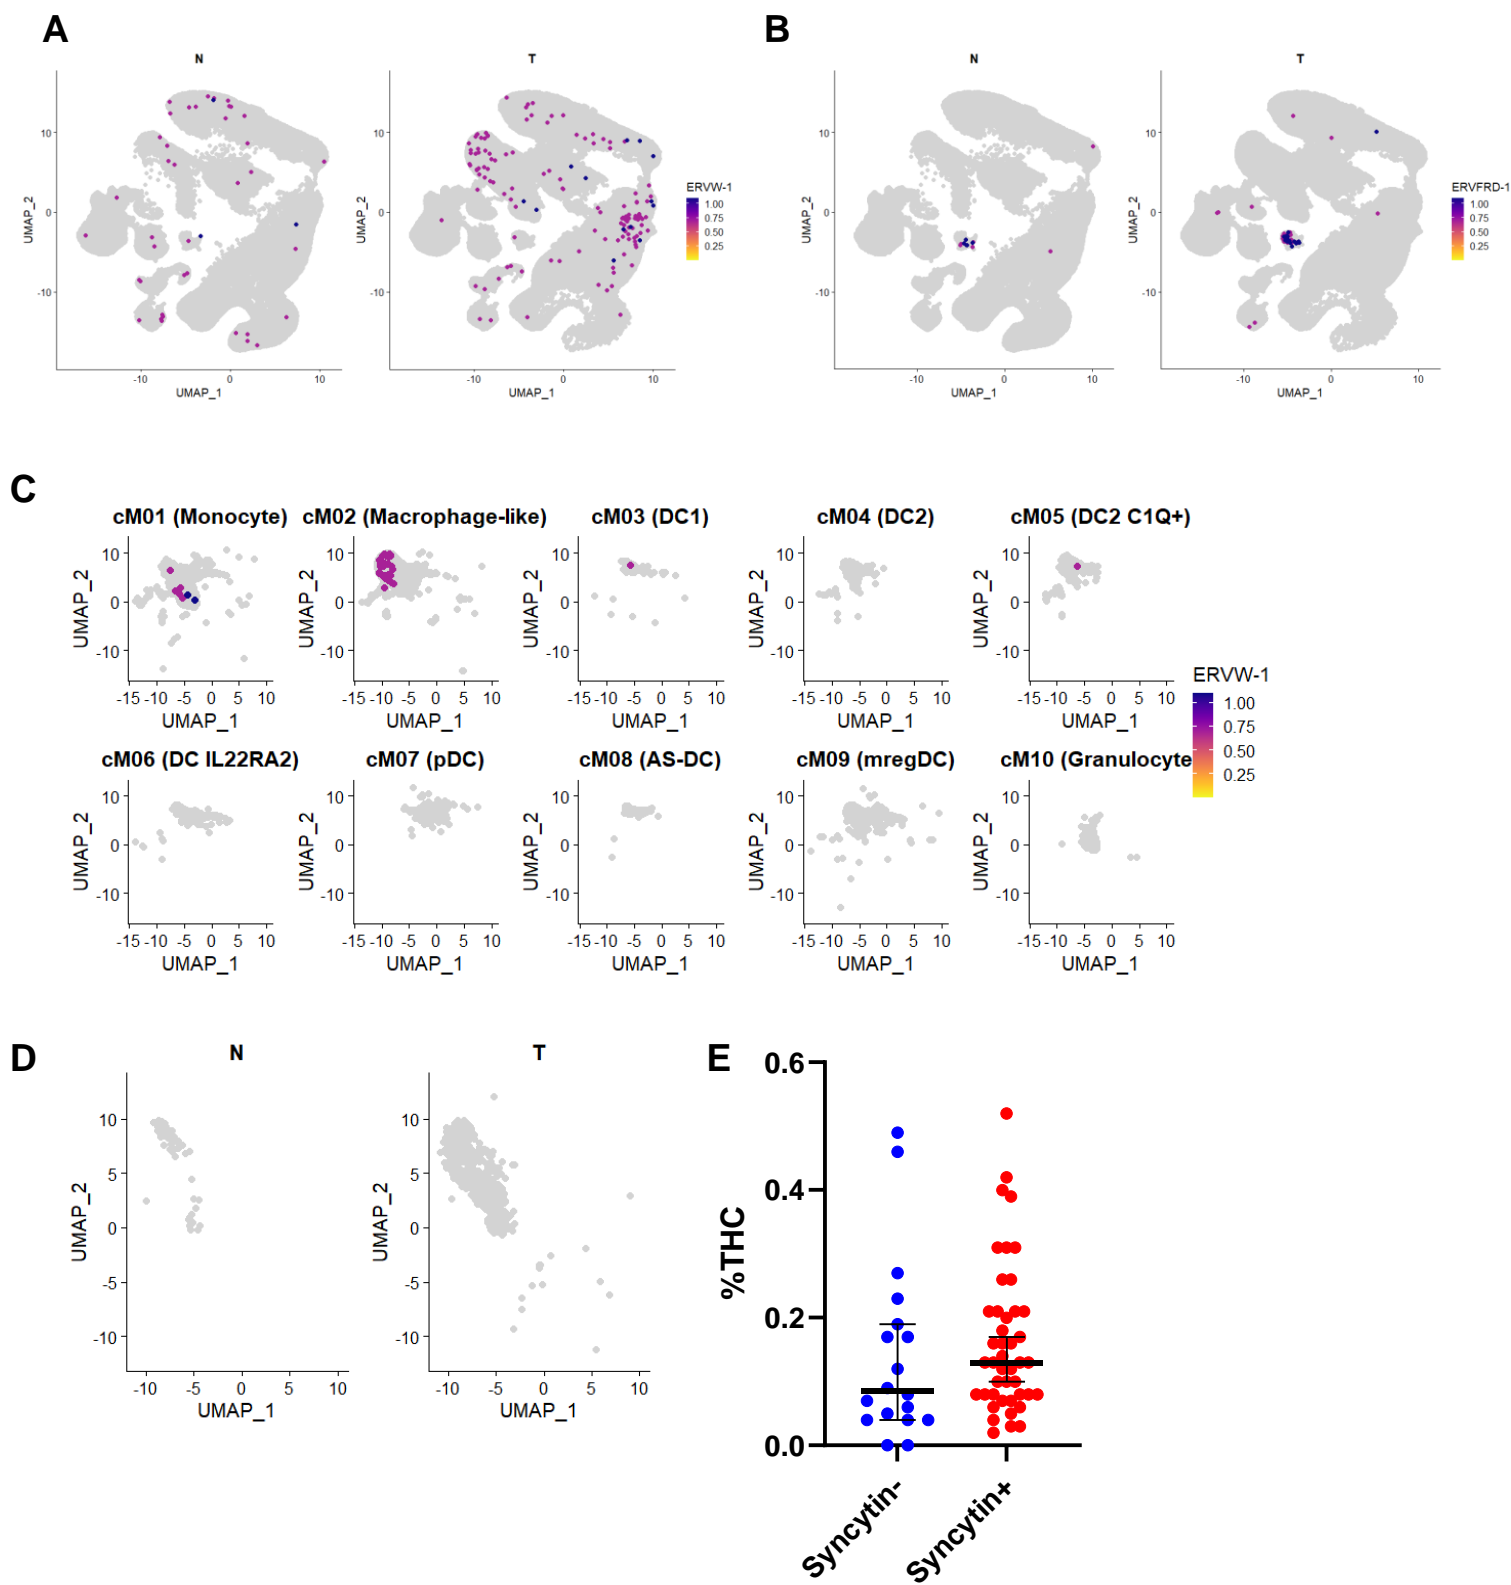

Supplement: s1 [file s1]
